# Supplementary material for: Host factors that shape the bacterial community structure on scalp hair shaft
Source: PubMed Central journal article supplement (PMC8421437; doi:10.1038/s41598-021-96767-w), 2021-09-06
Supplement: 41598_2021_96767_MOESM1_ESM.pdf [file 41598_2021_96767_MOESM1_ESM.pdf]

**Title**

Bacterial and host factors that shape the community structure on hair

**Aurhors**

Kota Watanabe<sup>a</sup>, Azusa Yamada<sup>a</sup>, Yuri Nishi<sup>a</sup>, Yukihiro Tashiro<sup>a,b\*</sup>, Kenji Sakai<sup>a,b\*</sup>

**Author affiliation**

<sup>a</sup>*Laboratory of Soil and Environmental Microbiology, Division of Systems Bioengineering, Department of Bioscience and Biotechnology, Faculty of Agriculture, Graduate School, Kyushu University, Motooka 744, Nishi-ku, Fukuoka 819-0395, Japan*

<sup>b</sup>*Laboratory of Microbial Environmental Protection, Tropical Microbiology Unit, Center for International Education and Research of Agriculture, Faculty of Agriculture, Kyushu University, Motooka 744, Nishi-ku, Fukuoka 819-0395, Japan*

**Corresponding authors**

Kenji Sakai

Laboratory of Soil and Environmental Microbiology, Division of Systems Bioengineering, Department of Bioscience and Biotechnology, Faculty of Agriculture, Graduate School, Kyushu University, Motooka 744, Nishi-ku, Fukuoka 819-0395, Japan.

TEL: +81-92-802-4738; E-mail: kensak@agr.kyushu-u.ac.jp

Yukihiro Tashiro

Laboratory of Soil and Environmental Microbiology, Division of Systems Bioengineering, Department of Bioscience and Biotechnology, Faculty of Agriculture, Graduate School, Kyushu University, Motooka 744, Nishi-ku, Fukuoka 819-0395, Japan.

TEL: +81-92-802-4739; E-mail: tashiro@agr.kyushu-u.ac.jp

Fig. S1 Correlation of bacterial cell number by qPCR and scalp hair characteristics.

(a) Correlation of bacterial cells / cm<sup>2</sup> and the hair length (cm). (b) Correlation of bacterial cells / cm<sup>2</sup> and the hair diameter.

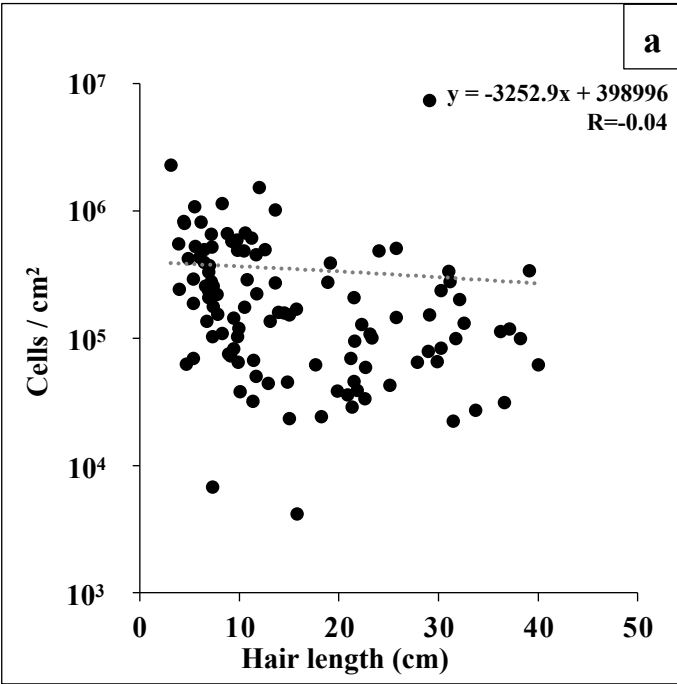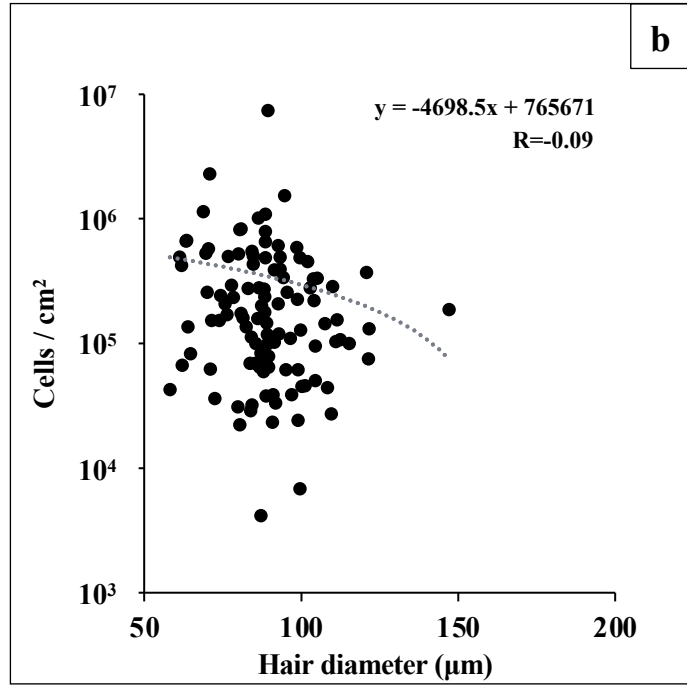

**Table S1 Detailed information of 109 volunteers, quantification of bacterial copy number by qPCR of the bacterial 16S rRNA gene, and analysis of bacterial community structure by 16S amplicon sequencings.**

| No.  | Gender | Age | Hair length (cm) | Hair diameter (µm) | Previous washed hair | Conditioner | Hair care product | Dryer  | Wax    | Hair color | Perm   | Bleach |
|------|--------|-----|------------------|--------------------|----------------------|-------------|-------------------|--------|--------|------------|--------|--------|
| F001 | Female | 22  | 38.2             | 89.0               | Lastnight            | Use         | Use               | Use    | Unused | Unused     | Unused | Unused |
| F002 | Female | 22  | 10.6             | 63.3               | Thismorning          | Use         | -                 | Unused | Unused | Use        | Unused | Unused |
| F003 | Female | 21  | 25.8             | 88.9               | Lastnight            | Use         | Use               | Use    | Unused | Use        | Use    | Unused |
| F004 | Female | 27  | 32.1             | 87.2               | Lastnight            | Unused      | Unused            | Use    | Unused | Unused     | Unused | Unused |
| F005 | Female | 23  | 21.5             | 75.6               | Thismorning          | Use         | -                 | Use    | Unused | Use        | Use    | Unused |
| F006 | Female | 22  | 29.1             | 73.9               | Lastnight            | Use         | Use               | Use    | Unused | Use        | Unused | Use    |
| F007 | Female | 21  | 29               | 89.5               | Lastnight            | Unused      | Use               | Use    | Unused | Use        | Unused | Use    |
| F008 | Female | 21  | 27.9             | 89.5               | Thismorning          | Use         | Use               | Use    | Unused | Use        | Unused | Unused |
| F009 | Female | 23  | 19.9             | 91.0               | Lastnight            | Use         | Use               | Use    | Use    | Use        | Use    | Unused |
| F010 | Female | 41  | 22.7             | 88.0               | Lastnight            | Use         | Use               | Unused | Use    | Unused     | Unused | Unused |
| F011 | Female | 27  | 36.7             | 79.7               | Lastnight            | Use         | -                 | Use    | Unused | Unused     | Use    | Unused |
| F012 | Female | 23  | 22.3             | 99.7               | Lastnight            | Use         | Unused            | Use    | Unused | Use        | Unused | Unused |
| F013 | Female | 36  | 30.3             | 87.1               | Lastnight            | Use         | Use               | Use    | Unused | Use        | Unused | Unused |
| F014 | Female | 43  | 32.6             | 121.5              | Lastnight            | Use         | Use               | Unused | Use    | Use        | Use    | Unused |
| F015 | Female | 39  | 22.6             | 91.7               | Lastnight            | Use         | Use               | Use    | Use    | Use        | Unused | Unused |
| F016 | Female | 39  | 19.2             | 91.3               | Lastnight            | Use         | Use               | Use    | Unused | Unused     | Use    | Unused |
| F017 | Female | 24  | 13.1             | 63.8               | Lastnight            | Use         | Unused            | Use    | Unused | Unused     | Unused | Unused |
| F018 | Female | 23  | 13.9             | 81.3               | Lastnight            | Use         | Unused            | Use    | Unused | Unused     | Unused | Unused |
| F019 | Female | 23  | 40               | 95.0               | Lastnight            | Unused      | Use               | Use    | Use    | Use        | Use    | Unused |
| F020 | Female | 64  | 10.1             | 88.7               | Lastnight            | Use         | Use               | Use    | Unused | Use        | Unused | Unused |
| F021 | Female | 21  | 21.5             | 101.2              | Lastnight            | Use         | Unused            | Use    | Use    | Unused     | Unused | Unused |
| F022 | Female | 22  | 17.7             | 98.9               | Lastnight            | Use         | Use               | Use    | Unused | Use        | Unused | Unused |
| F023 | Female | 37  | 14.5             | 86.0               | Lastnight            | Use         | Unused            | Use    | Unused | Unused     | Unused | Unused |
| F024 | Female | 21  | 21.6             | 104.4              | Lastnight            | Use         | Use               | Unused | Unused | -          | -      | Unused |
| F025 | Female | 26  | 15.1             | 90.8               | Lastnight            | Unused      | Use               | Use    | Unused | Use        | Unused | Unused |
| F026 | Female | 21  | 8.9              | 121.3              | Lastnight            | Use         | Unused            | Use    | Unused | Unused     | Use    | Unused |
| F027 | Female | 20  | 14.9             | 100.0              | Thismorning          | Use         | -                 | Use    | Unused | Use        | Unused | Use    |
| F028 | Female | 20  | 11.7             | 104.4              | Lastnight            | Use         | -                 | Use    | Unused | Unused     | Unused | Unused |
| F029 | Female | 19  | 9.8              | 93.3               | Lastnight            | Use         | Use               | Use    | Use    | Unused     | Unused | Unused |
| F030 | Female | 22  | 7.35             | 88.3               | Thismorning          | Use         | Unused            | Use    | Unused | Unused     | Unused | Unused |
| F031 | Female | 19  | 23.1             | 112.2              | Thismorning          | Use         | Unused            | Use    | Unused | Use        | Unused | Unused |
| F032 | Female | 21  | 18.9             | 82.9               | Lastnight            | Use         | Use               | Use    | Use    | Use        | Use    | Unused |
| F033 | Female | 21  | 13.6             | 88.1               | Lastnight            | Use         | Use               | Use    | Unused | Unused     | Use    | Unused |
| F034 | Female | 19  | 18.3             | 98.9               | Lastnight            | Use         | Use               | Use    | Unused | Use        | Unused | Unused |
| F035 | Female | 20  | 9.45             | 64.6               | Lastnight            | Unused      | Use               | Use    | Use    | Use        | Unused | Unused |
| F036 | Female | 21  | 15               | 71.5               | Lastnight            | Use         | Unused            | Use    | Use    | Unused     | Unused | Unused |
| F037 | Female | 21  | 11.4             | 84.1               | Lastnight            | Use         | Unused            | Use    | Unused | Unused     | Unused | Unused |
| F038 | Female | 19  | 21.9             | 96.8               | Thismorning          | Use         | Unused            | Use    | Unused | Unused     | Unused | Unused |
| F039 | Female | 22  | 21.4             | 83.9               | -                    | Use         | Use               | Use    | Use    | Use        | Unused | Use    |
| F040 | Female | 22  | 25.8             | 84.6               | Lastnight            | Use         | Use               | Use    | Unused | Use        | Unused | Use    |
| F041 | Female | 21  | 33.8             | 109.4              | Thismorning          | Use         | Unused            | Use    | Use    | Use        | Unused | Unused |
| F042 | Female | 22  | 30.3             | 88.3               | Lastnight            | Use         | Use               | Use    | Unused | Use        | Unused | Use    |
| F043 | Female | 21  | 20.9             | 72.3               | Lastnight            | Use         | Use               | Use    | Use    | Use        | Unused | Use    |
| F044 | Female | 24  | 39.1             | 94.2               | Lastnight            | Use         | -                 | Unused | Unused | Unused     | Unused | Unused |
| F045 | Female | 22  | 29.9             | 87.3               | Lastnight            | Unused      | Unused            | Use    | Unused | Use        | Unused | Use    |
| F046 | Female | 20  | 11.4             | 62.0               | Lastnight            | Use         | Use               | Use    | Use    | Use        | Unused | Unused |
| F047 | Female | 21  | 15.8             | 87.1               | Lastnight            | Use         | Use               | Use    | Use    | Use        | Unused | Use    |
| F048 | Female | 21  | 12               | 94.6               | Lastnight            | Use         | -                 | Use    | Unused | Unused     | Unused | Unused |
| F049 | Female | 21  | 29.1             | 89.4               | Lastnight            | Use         | Use               | Use    | Unused | Use        | Unused | -      |
| F050 | Female | 20  | 24               | 99.5               | Lastnight            | Unused      | Use               | Use    | Unused | Use        | Use    | Unused |
| F051 | Female | 21  | 15.7             | 76.3               | Lastnight            | Use         | -                 | Use    | Use    | Unused     | Unused | Unused |
| F052 | Female | 20  | 31.8             | 85.5               | Lastnight            | Use         | Use               | Use    | Use    | Use        | Unused | -      |
| F053 | Female | 21  | 12.9             | 108.2              | Lastnight            | Use         | Use               | Use    | Use    | Use        | Unused | Unused |
| F054 | Female | 21  | 25.1             | 58.2               | Lastnight            | Use         | -                 | Use    | Unused | Use        | Use    | Unused |
| F055 | Female | 20  | 9.85             | 86.7               | Thismorning          | Use         | Unused            | Use    | Use    | Use        | Unused | Unused |
| F056 | Female | 21  | 31.2             | 102.7              | Lastnight            | Use         | Unused            | Use    | Unused | Use        | Unused | Unused |
| F057 | Female | 22  | 21.2             | 83.6               | Lastnight            | Use         | Use               | Use    | Use    | Use        | Unused | Unused |
| F058 | Female | 24  | 31.5             | 80.3               | Thismorning          | Use         | Unused            | Use    | Unused | Use        | Unused | Unused |
| F059 | Female | 20  | 36.3             | 84.0               | Lastnight            | Use         | Use               | Use    | Unused | Use        | Unused | Unused |
| F060 | Female | 23  | 23.3             | 115.2              | Lastnight            | Use         | Use               | Use    | Use    | -          | Unused | Unused |
| F061 | Female | 24  | 37.2             | 89.0               | Lastnight            | Use         | Use               | Use    | Unused | Use        | Unused | Unused |
| F062 | Female | 24  | 31               | 105.0              | Lastnight            | Use         | Use               | Use    | Use    | Use        | Use    | Unused |
| M001 | Male   | 25  | 9.8              | 98.4               | Thismorning          | Unused      | Unused            | Use    | Unused | Unused     | Unused | Unused |
| M002 | Male   | 26  | 3.1              | 70.8               | Lastnight            | Use         | Unused            | Use    | Unused | Unused     | Unused | Unused |
| M003 | Male   | 22  | 8.3              | 68.7               | Thismorning          | Use         | Unused            | Use    | Unused | Unused     | Unused | Unused |
| M004 | Male   | 22  | 6.5              | 76.6               | Lastnight            | Use         | Unused            | Use    | Unused | Unused     | Unused | Unused |
| M005 | Male   | 22  | 11.7             | 102.0              | Lastnight            | Unused      | Unused            | Use    | Unused | Unused     | Use    | Unused |
| M006 | Male   | 29  | 10.8             | 109.8              | Lastnight            | Unused      | Unused            | Use    | Unused | Unused     | Unused | Unused |
| M007 | Male   | 22  | 11.2             | 92.5               | Lastnight            | Unused      | Unused            | Use    | Unused | Unused     | Unused | Unused |
| M008 | Male   | 23  | 10.5             | 88.4               | Lastnight            | Use         | Unused            | Use    | Unused | Unused     | Unused | Unused |
| M009 | Male   | 25  | 5.5              | 88.4               | Lastnight            | Unused      | Unused            | Unused | Unused | Unused     | Unused | Unused |
| M010 | Male   | 22  | 10.5             | 80.8               | Thismorning          | Use         | Unused            | Use    | Unused | Unused     | Unused | Unused |
| M011 | Male   | 23  | 10.0             | 92.8               | Lastnight            | Use         | Unused            | Unused | Unused | Unused     | Unused | Unused |
| M012 | Male   | 62  | 4.9              | 61.8               | Lastnight            | Unused      | Unused            | Unused | Unused | Unused     | Unused | Unused |
| M013 | Male   | 40  | 7.9              | 111.4              | Lastnight            | Unused      | Unused            | Use    | Unused | Use        | Unused | Unused |
| M014 | Male   | 23  | 7.8              | 104.0              | Thismorning          | Unused      | Unused            | Use    | Unused | Unused     | Unused | Unused |
| M015 | Male   | 31  | 7.3              | 99.4               | Thismorning          | Use         | Unused            | Use    | Use    | Unused     | Unused | Unused |
| M016 | Male   | 56  | 8.8              | 63.3               | Thismorning          | Use         | Unused            | Unused | Unused | Unused     | Unused | Unused |
| M017 | Male   | 37  | 6.2              | 80.4               | Lastnight            | Unused      | Unused            | Use    | Unused | Unused     | Unused | Unused |
| M018 | Male   | 27  | 12.6             | 61.1               | Thismorning          | Unused      | -                 | Use    | Unused | Unused     | Unused | Unused |
| M019 | Male   | 27  | 6.6              | 95.3               | Lastnight            | Use         | Unused            | Unused | Unused | Unused     | Unused | Unused |
| M020 | Male   | 54  | 5.6              | 69.6               | Lastnight            | Unused      | Unused            | Unused | Use    | Unused     | Unused | Unused |
| M021 | Male   | 45  | 6.9              | 78.3               | Thismorning          | Unused      | Unused            | Unused | Use    | Unused     | Unused | Unused |
| M022 | Male   | 22  | 3.9              | 84.2               | Lastnight            | Unused      | Unused            | Use    | Use    | Unused     | Unused | Unused |
| M023 | Male   | 22  | 7.0              | 120.6              | Lastnight            | Use         | Unused            | Use    | Unused | Unused     | Unused | Unused |
| M024 | Male   | 22  | 7.3              | 91.3               | Thismorning          | Unused      | Unused            | Use    | Unused | Unused     | Unused | Unused |
| M025 | Male   | 33  | 11.8             | 98.8               | Thismorning          | Use         | Unused            | Unused | Unused | Use        | Unused | Unused |
| M026 | Male   | 21  | 4.7              | 71.0               | Lastnight            | Use         | Unused            | Use    | Unused | Use        | Unused | Unused |
| M027 | Male   | 24  | 9.5              | 107.5              | Thismorning          | Unused      | Unused            | Use    | Unused | Unused     | Use    | Unused |
| M028 | Male   | 20  | 13.6             | 86.2               | Thismorning          | -           | Unused            | Use    | Unused | Unused     | Unused | Unused |
| M029 | Male   | 21  | 5.4              | 77.6               | Lastnight            | Use         | Unused            | Use    | Unused | Unused     | Unused | Unused |
| M030 | Male   | 20  | 6                | 84.7               | Lastnight            | Use         | Unused            | Use    | Unused | Unused     | Unused | Unused |
| M031 | Male   | 22  | 9.8              | 110.8              | Thismorning          | Use         | Use               | Use    | Unused | Unused     | Unused | Unused |
| M032 | Male   | 21  | 6.8              | 82.5               | Thismorning          | Unused      | Unused            | Use    | Unused | Unused     | Unused | Unused |
| M033 | Male   | 20  | 7.3              | 79.9               | Lastnight            | Unused      | Unused            | Use    | Unused | Unused     | Unused | Unused |
| M034 | Male   | 22  | 4.5              | 88.4               | Lastnight            | Unused      | Unused            | Use    | Unused | Unused     | Unused | Unused |
| M035 | Male   | 20  | 4.4              | 80.8               | Lastnight            | Unused      | Use               | Use    | Unused | Unused     | Unused | Unused |
| M036 | Male   | 38  | 7.2              | 86.5               | Thismorning          | Unused      | Unused            | Unused | Unused | Unused     | Unused | Unused |
| M037 | Male   | 25  | 6.5              | 93.2               | Lastnight            | Use         | Unused            | Use    | Use    | Unused     | Unused | Unused |
| M038 | Male   | 23  | 7.2              | 88.4               | Lastnight            | Use         | Unused            | Use    | Use    | Unused     | Use    | Unused |
| M039 | Male   | 21  | 6.9              | 103.8              | Lastnight            | Use         | Unused            | Unused | Unused | Unused     | Unused | Unused |
| M040 | Male   | 20  | 4.0              | 74.3               | Lastnight            | Unused      | Unused            | Use    | Use    | Unused     | Unused | Unused |
| M041 | Male   | 21  | 8.3              | 96.4               | Lastnight            | Use         | Unused            | Use    | Use    | Use        | Use    | Unused |
| M042 | Male   | 21  | 9.1              | 87.3               | Lastnight            | Unused      | Use               | Use    | Use    | Use        | Unused | Unused |
| M043 | Male   | 21  | 5.4              | 147.1              | Lastnight            | Unused      | Unused            | Use    | Unused | Unused     | Unused | Unused |
| M044 | Male   | 20  | 7.4              | 69.9               | Lastnight            | Use         | Unused            | Use    | Unused | Unused     | Unused | Unused |
| M045 | Male   | 20  | 5.4              | 85.2               | Lastnight            | Use         | Unused            | Use    | Unused | Unused     | Unused | Unused |
| M046 | Male   | 22  | 6.9              | 92.7               | Thismorning          | Use         | Unused            | Use    | Unused | Use        | Use    | Unused |
| M047 | Male   | 24  | 9.3              | 70.3               | Lastnight            | Unused      | Use               | Use    | Use    | Unused     | Unused | Unused |

**Table S2 Alpha diversity, total bacterial cells / cm<sup>2</sup>, and absolute number of major bacterial genera at host intrinsic factors age and ethnicity.**

| Intrinsic factor | Factor type    | Alpha-diversity |            | Total bacterial cells / cm <sup>2</sup> on scalp hair | bacterial cells / cm <sup>2</sup> on scalp hair |                              |                               |                              |                              |
|------------------|----------------|-----------------|------------|-------------------------------------------------------|-------------------------------------------------|------------------------------|-------------------------------|------------------------------|------------------------------|
|                  |                | Observed OTUs   | shannon    |                                                       | <i>Cutibacterium</i>                            | <i>Lawsonella</i>            | <i>Pseudomonas</i>            | <i>Moraxella</i>             | <i>Staphylococcus</i>        |
| Age              | 10-20s (n=93)  | 51.6(± 17.3)    | 2.9(± 0.7) | 3.6(± 8.1) × 10 <sup>5</sup>                          | 1.1(± 1.2) × 10 <sup>5</sup>                    | 3.8(± 7.5) × 10 <sup>4</sup> | 1.1(± 5.5) × 10 <sup>5</sup>  | 2.2(± 6.0) × 10 <sup>4</sup> | 2.3(± 5.5) × 10 <sup>4</sup> |
|                  | 30-40s (n=12)  | 46.7(± 16.7)    | 2.9(± 0.7) | 2.2(± 2.1) × 10 <sup>5</sup>                          | 8.8(± 7.3) × 10 <sup>4</sup>                    | 2.1(± 4.4) × 10 <sup>4</sup> | 7.1(± 12.5) × 10 <sup>4</sup> | 2.4(± 4.0) × 10 <sup>3</sup> | 9.9(± 9.2) × 10 <sup>3</sup> |
|                  | 50-60s (n=4)   | 55.4(± 4.3)     | 3.3(± 0.2) | 4.1(± 2.3) × 10 <sup>5</sup>                          | 1.1(± 0.7) × 10 <sup>5</sup>                    | 5.8(± 5.0) × 10 <sup>4</sup> | 1.4(± 1.8) × 10 <sup>5</sup>  | 1.5(± 2.1) × 10 <sup>4</sup> | 3.0(± 2.4) × 10 <sup>4</sup> |
| Ethnicity        | Japan (n=102)  | 52.0(± 17.3)    | 2.9(± 0.7) | 3.2(± 7.5) × 10 <sup>5</sup>                          | 1.0(± 1.1) × 10 <sup>5</sup>                    | 3.5(± 6.7) × 10 <sup>4</sup> | 9.1(± 51.6) × 10 <sup>4</sup> | 1.5(± 3.7) × 10 <sup>4</sup> | 2.3(± 5.3) × 10 <sup>4</sup> |
|                  | China (n=4)    | 36.4(± 9.7)     | 2.7(± 0.1) | 1.1(± 0.9) × 10 <sup>6</sup>                          | 2.7(± 2.6) × 10 <sup>5</sup>                    | 1.1(± 1.4) × 10 <sup>5</sup> | 5.1(± 4.9) × 10 <sup>5</sup>  | 1.3(± 2.0) × 10 <sup>5</sup> | 6.0(± 2.4) × 10 <sup>3</sup> |
|                  | Thailand (n=2) | 48.4(± 17.2)    | 2.1(± 0.7) | 1.9(± 0.3) × 10 <sup>5</sup>                          | 1.3(± 0.5) × 10 <sup>5</sup>                    | 4.0(± 2.5) × 10 <sup>3</sup> | 1.9(± 1.8) × 10 <sup>4</sup>  | 1.1(± 0.2) × 10 <sup>3</sup> | 1.3(± 0.8) × 10 <sup>4</sup> |
|                  | America (n=1)  | 41              | 3.3        | 6.7 × 10 <sup>5</sup>                                 | 9.8 × 10 <sup>4</sup>                           | 1.2 × 10 <sup>4</sup>        | 4.9 × 10 <sup>5</sup>         | 2.6 × 10 <sup>4</sup>        | 1.8 × 10 <sup>4</sup>        |

**Table S3 Absolute number of major bacterial genera at each comparative category.**

| Extrinsic factor   | Total bacterial cells/cm <sup>2</sup> | bacterial cells / cm <sup>2</sup> on scalp hair |                            |                            |                            |                            |                            |                            |                           |
|--------------------|---------------------------------------|-------------------------------------------------|----------------------------|----------------------------|----------------------------|----------------------------|----------------------------|----------------------------|---------------------------|
|                    |                                       | <i>Cutibacterium</i>                            | <i>Lawsonella</i>          | <i>Pseudomonas</i>         | <i>Moraxella</i>           | <i>Staphylococcus</i>      |                            |                            |                           |
| Hair wash          | Previous hair washed time             | This morning (n=26)                             | 3.7(±8.5)×10 <sup>5</sup>  | 8.1(±6.7)×10 <sup>4</sup>  | 1.8(±2.6)×10 <sup>4</sup>  | 9.8(±18.5)×10 <sup>4</sup> | 1.6(±4.9)×10 <sup>4</sup>  | 1.1(±1.1)×10 <sup>4</sup>  |                           |
|                    |                                       | Last night (n=82)                               | 2.8(±3.0)×10 <sup>5</sup>  | 1.1(±1.3)×10 <sup>5</sup>  | 4.3(±8.0)×10 <sup>4</sup>  | 1.1(±5.8)×10 <sup>5</sup>  | 2.1(±5.9)×10 <sup>4</sup>  | 2.6(±5.8)×10 <sup>4</sup>  |                           |
|                    | Conditioner                           | Use (n=77)                                      | 3.3(±8.8)×10 <sup>5</sup>  | 9.2(±11.6)×10 <sup>4</sup> | 2.5(±5.0)×10 <sup>4</sup>  | 1.3(±6.1)×10 <sup>5</sup>  | 1.7(±5.7)×10 <sup>4</sup>  | 1.6(±3.1)×10 <sup>4</sup>  |                           |
|                    |                                       | Unused (n=31)                                   | 3.7(±2.7)×10 <sup>5</sup>  | 1.4(±1.1)×10 <sup>5</sup>  | 6.8(±10.3)×10 <sup>4</sup> | 5.9(±11.3)×10 <sup>4</sup> | 1.7(±3.6)×10 <sup>4</sup>  | 3.8(±8.1)×10 <sup>4</sup>  |                           |
|                    | Haircare                              | Use (n=40)                                      | 3.5(±10.1)×10 <sup>5</sup> | 7.8(±10.5)×10 <sup>4</sup> | 2.5(±6.7)×10 <sup>4</sup>  | 1.5(±8.0)×10 <sup>5</sup>  | 1.2(±2.6)×10 <sup>4</sup>  | 1.5(±2.8)×10 <sup>4</sup>  |                           |
|                    |                                       | Unused (n=59)                                   | 3.4(±3.7)×10 <sup>5</sup>  | 1.3(±1.3)×10 <sup>5</sup>  | 4.9(±7.8)×10 <sup>4</sup>  | 6.6(±19.0)×10 <sup>4</sup> | 1.9(±4.3)×10 <sup>4</sup>  | 2.9(±6.5)×10 <sup>4</sup>  |                           |
|                    | Dryer                                 | Use (n=94)                                      | 3.4(±8.1)×10 <sup>5</sup>  | 1.0(±1.2)×10 <sup>5</sup>  | 3.4(±6.4)×10 <sup>4</sup>  | 1.1(±5.5)×10 <sup>5</sup>  | 2.1(±6.0)×10 <sup>4</sup>  | 1.7(±3.2)×10 <sup>4</sup>  |                           |
|                    |                                       | Unused (n=15)                                   | 3.6(±2.7)×10 <sup>5</sup>  | 1.1(±0.6)×10 <sup>5</sup>  | 5.6(±10.4)×10 <sup>4</sup> | 8.4(±15.4)×10 <sup>4</sup> | 9.2(±13.3)×10 <sup>3</sup> | 5.2(±10.9)×10 <sup>4</sup> |                           |
|                    | Hair styling                          | Wax                                             | Use (n=32)                 | 1.8(±1.9)×10 <sup>5</sup>  | 8.4(±10.0)×10 <sup>4</sup> | 1.9(±3.2)×10 <sup>4</sup>  | 2.0(±2.6)×10 <sup>4</sup>  | 1.3(±3.0)×10 <sup>4</sup>  | 1.3(±2.0)×10 <sup>4</sup> |
|                    |                                       |                                                 | Unused (n=77)              | 4.2(±8.8)×10 <sup>5</sup>  | 1.1(±1.2)×10 <sup>5</sup>  | 4.5(±8.2)×10 <sup>4</sup>  | 1.5(±6.1)×10 <sup>5</sup>  | 2.2(±6.4)×10 <sup>4</sup>  | 2.6(±5.9)×10 <sup>4</sup> |
| Chemical treatment | Color                                 | Use (n=46)                                      | 2.9(±10.7)×10 <sup>5</sup> | 6.4(±9.0)×10 <sup>4</sup>  | 1.2(±2.3)×10 <sup>4</sup>  | 1.4(±7.5)×10 <sup>5</sup>  | 8.4(±15.8)×10 <sup>3</sup> | 1.1(±2.3)×10 <sup>4</sup>  |                           |
|                    |                                       | Unused (n=61)                                   | 4.0(±3.9)×10 <sup>5</sup>  | 1.4(±1.3)×10 <sup>5</sup>  | 5.7(±8.9)×10 <sup>4</sup>  | 8.6(±21.1)×10 <sup>4</sup> | 2.8(±7.3)×10 <sup>4</sup>  | 3.1(±6.4)×10 <sup>4</sup>  |                           |
|                    | Perm                                  | Use (n=18)                                      | 2.3(±1.7)×10 <sup>5</sup>  | 9.9(±9.4)×10 <sup>4</sup>  | 3.1(±4.6)×10 <sup>4</sup>  | 4.8(±6.6)×10 <sup>4</sup>  | 1.1(±1.6)×10 <sup>4</sup>  | 8.8(±9.6)×10 <sup>3</sup>  |                           |
|                    |                                       | Unused (n=90)                                   | 3.7(±8.3)×10 <sup>5</sup>  | 1.1(±1.2)×10 <sup>5</sup>  | 3.8(±7.6)×10 <sup>4</sup>  | 1.2(±5.7)×10 <sup>5</sup>  | 2.1(±6.1)×10 <sup>4</sup>  | 2.5(±5.6)×10 <sup>4</sup>  |                           |
| Bleach             | Use (n=9)                             | 1.3(±1.5)×10 <sup>5</sup>                       | 6.2(±7.0)×10 <sup>4</sup>  | 1.4(±2.0)×10 <sup>4</sup>  | 4.3(±4.2)×10 <sup>3</sup>  | 1.5(±2.5)×10 <sup>4</sup>  | 2.0(±3.2)×10 <sup>4</sup>  |                            |                           |
|                    | Unused (n=98)                         | 3.7(±8.3)×10 <sup>5</sup>                       | 1.1(±1.1)×10 <sup>5</sup>  | 3.8(±7.4)×10 <sup>4</sup>  | 6.8(±17.6)×10 <sup>4</sup> | 2.0(±5.9)×10 <sup>4</sup>  | 2.2(±5.3)×10 <sup>4</sup>  |                            |                           |

Kruskal-Wallis test, \*p&lt;0.05, \*\*p&lt;0.01

**Table S4 Similarity percentage analysis of the genus differences with treatment. Contribution shows the dissimilarity explained by that genus.**

|                       | Extrinsic factor             | Genus                 | Contribution | Mean abundance<br>(This morning) | Mean abundance<br>(Last night) | Change in abundance<br>with treatment |
|-----------------------|------------------------------|-----------------------|--------------|----------------------------------|--------------------------------|---------------------------------------|
| Hair wash             | Previous hair<br>washed time | <i>Pseudomonas</i>    | 12.5%        | 23.0%                            | 17.5%                          | 5.5%                                  |
|                       |                              | <i>Cutibacterium</i>  | 12.2%        | 40.2%                            | 42.3%                          | -2.2%                                 |
|                       |                              | <i>Lawsonella</i>     | 5.2%         | 9.4%                             | 10.0%                          | -0.6%                                 |
|                       |                              | <i>Staphylococcus</i> | 3.4%         | 5.3%                             | 7.9%                           | -2.6%                                 |
|                       |                              | <i>Moraxella</i>      | 2.9%         | 4.2%                             | 4.5%                           | -0.3%                                 |
| Conditioner           |                              | <i>Cutibacterium</i>  | 11.2%        | 42.0%                            | 41.3%                          | 0.7%                                  |
|                       |                              | <i>Pseudomonas</i>    | 11.0%        | 20.5%                            | 14.7%                          | 5.9%                                  |
|                       |                              | <i>Lawsonella</i>     | 6.1%         | 8.1%                             | 14.0%                          | -5.9%                                 |
|                       |                              | <i>Staphylococcus</i> | 4.5%         | 6.2%                             | 9.7%                           | -3.5%                                 |
|                       |                              | <i>Moraxella</i>      | 3.1%         | 4.4%                             | 4.7%                           | -0.4%                                 |
| Haircare              |                              | <i>Pseudomonas</i>    | 11.6%        | 21.2%                            | 17.4%                          | 3.8%                                  |
|                       |                              | <i>Cutibacterium</i>  | 10.9%        | 43.8%                            | 40.7%                          | 3.1%                                  |
|                       |                              | <i>Lawsonella</i>     | 5.2%         | 7.7%                             | 11.0%                          | -3.3%                                 |
|                       |                              | <i>Staphylococcus</i> | 4.1%         | 6.6%                             | 7.6%                           | -1.0%                                 |
|                       |                              | <i>Moraxella</i>      | 3.0%         | 4.1%                             | 4.6%                           | -0.5%                                 |
| Hair styling          | Dryer                        | <i>Pseudomonas</i>    | 11.8%        | 18.7%                            | 19.4%                          | -0.7%                                 |
|                       |                              | <i>Cutibacterium</i>  | 11.7%        | 42.1%                            | 39.7%                          | 2.4%                                  |
|                       |                              | <i>Lawsonella</i>     | 5.5%         | 9.6%                             | 11.2%                          | -1.6%                                 |
|                       |                              | <i>Staphylococcus</i> | 4.3%         | 6.9%                             | 9.5%                           | -2.6%                                 |
|                       |                              | <i>Moraxella</i>      | 2.6%         | 4.7%                             | 2.9%                           | 1.8%                                  |
| Wax                   |                              | <i>Pseudomonas</i>    | 11.2%        | 19.6%                            | 18.5%                          | 1.1%                                  |
|                       |                              | <i>Cutibacterium</i>  | 11.0%        | 45.8%                            | 40.2%                          | 5.7%                                  |
|                       |                              | <i>Lawsonella</i>     | 4.9%         | 7.1%                             | 11.0%                          | -3.9%                                 |
|                       |                              | <i>Staphylococcus</i> | 4.1%         | 7.9%                             | 7.0%                           | 0.9%                                  |
|                       |                              | <i>Moraxella</i>      | 2.9%         | 3.9%                             | 4.7%                           | -0.7%                                 |
| Color                 |                              | <i>Pseudomonas</i>    | 11.6%        | 22.3%                            | 16.3%                          | 6.0%                                  |
|                       |                              | <i>Cutibacterium</i>  | 10.9%        | 42.2%                            | 41.5%                          | 0.7%                                  |
|                       |                              | <i>Lawsonella</i>     | 5.3%         | 6.5%                             | 12.2%                          | -5.7%                                 |
|                       |                              | <i>Staphylococcus</i> | 4.0%         | 6.5%                             | 7.8%                           | -1.3%                                 |
|                       |                              | <i>Moraxella</i>      | 2.9%         | 4.0%                             | 4.8%                           | -0.9%                                 |
| Chemical<br>treatment | Perm                         | <i>Pseudomonas</i>    | 11.6%        | 22.1%                            | 18.2%                          | 3.9%                                  |
|                       |                              | <i>Cutibacterium</i>  | 10.4%        | 42.9%                            | 41.6%                          | 1.3%                                  |
|                       |                              | <i>Lawsonella</i>     | 5.2%         | 10.0%                            | 9.8%                           | 0.2%                                  |
|                       |                              | <i>Staphylococcus</i> | 3.3%         | 4.1%                             | 7.9%                           | -3.7%                                 |
|                       |                              | <i>Moraxella</i>      | 2.7%         | 3.6%                             | 4.6%                           | -1.0%                                 |
| Bleach                |                              | <i>Pseudomonas</i>    | 11.4%        | 15.8%                            | 19.1%                          | -3.3%                                 |
|                       |                              | <i>Cutibacterium</i>  | 10.8%        | 45.4%                            | 41.5%                          | 3.9%                                  |
|                       |                              | <i>Lawsonella</i>     | 4.9%         | 8.7%                             | 9.9%                           | -1.2%                                 |
|                       |                              | <i>Staphylococcus</i> | 4.2%         | 8.2%                             | 7.1%                           | 1.1%                                  |
|                       |                              | <i>Moraxella</i>      | 3.4%         | 5.9%                             | 4.3%                           | 1.6%                                  |
